# Supplementary material
Source: PubMed Central journal article supplement (PMC3268287)
Supplement: 1120581109_pnas.201120581SI.pdf [file 1120581109_pnas.201120581SI.pdf]

# Supporting Information

Butler et al. 10.1073/pnas.1120581109

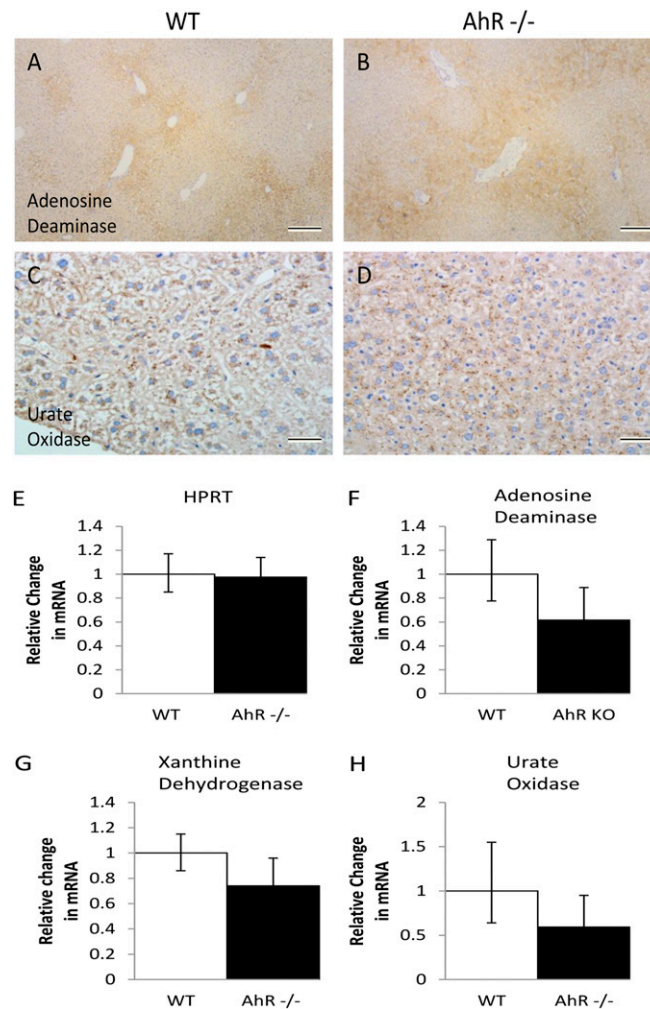

**Fig. S1.** There was no noticeable change in the protein or RNA levels of several members of the purine degradation pathway in the livers of 6-mo-old *AhR*<sup>-/-</sup> mice compared with wild-type littermates. There were six mice in each group. Immunohistochemistry shows similar staining patterns for adenosine deaminase (A and B) and urate oxidase (C and D) in the livers of 6-mo-old wild-type and *AhR*<sup>-/-</sup> mice. The level of Hypoxanthine-guanine phosphoribosyltransferase RNA in the liver was measured by real-time quantitative PCR. (E) Adenosine deaminase (F), xanthine dehydrogenase (G), and urate oxidase (H) were not significantly different between the 6-mo-old wild-type or *AhR*<sup>-/-</sup> littermates. (Scale bars in A and B, 200 μm; C and D, 20 μm.) Error bars represent SD.

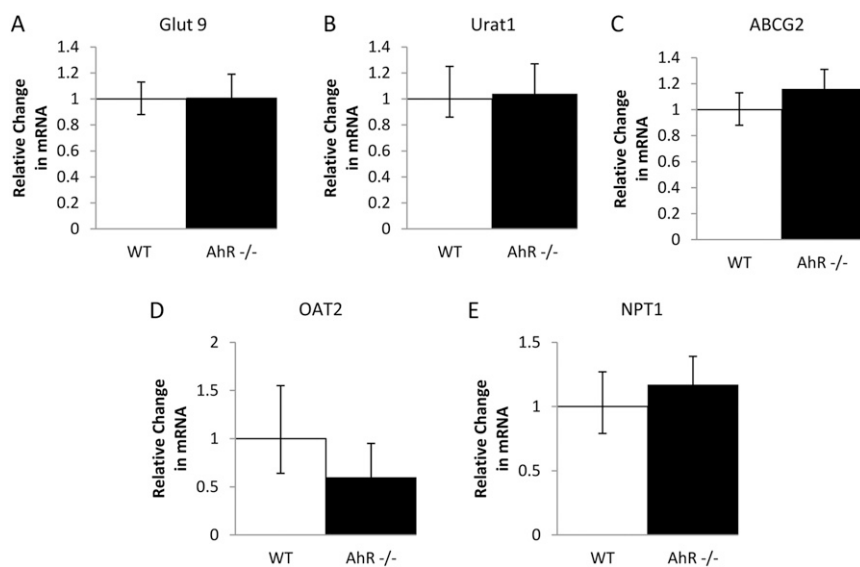

**Fig. S2.** There was no significant difference in the mRNA levels of several different urate transporters in the kidneys of 6-mo-old AhR<sup>-/-</sup> mice compared with wild-type littermates. mRNA levels of six mice from each group were measured using real-time quantitative PCR. There was no significant change in Glut 9 (A), Urat1 (B), ABCG2 (C), OAT2 (D), or NPT1 (E). Error bars represent SD.

**Table S1. Primers used in real-time qPCR in this study**

| Target gene   | Forward primer                       | Reverse primer                       |
|---------------|--------------------------------------|--------------------------------------|
| Urat 1        | 5'-TTC TTC TGG CCG TCT CCA TC-3'     | 5'-CGT GGC GTT GGA CTC TGT AAG-3'    |
| Glut 9        | 5'-GCC CAC GCT ACC TTC TCT TTG-3'    | 5'-AAC CAG ATC GCA TTG AGT CCA-3'    |
| NPT1          | 5'-TCT GTT CCT TCC GGT ATG GAC-3'    | 5'-AGA ACT GAG AAT AAG CCC TTG GA-3' |
| OAT2          | 5'-CAA CTG CGG AAT CTG GTG CT-3'     | 5'-ATC AGG CAG GGC ACA ATG ATG-3'    |
| HPRT          | 5'-TCA GTC AAC GGG GGA CAT AAA-3'    | 5'-GGG GCT GTA CTG CTT AAC CAG-3'    |
| ABCG2         | 5'-GAA CTC CAG AGC CGT TAG GAC-3'    | 5'-CAG AAT AGC ATT AAG GCC AGG TT-3' |
| Urate oxidase | 5'-GAA GTG GAA TTT GTC CGA ACT GG-3' | 5'-CGA AGT TGC CAC CTC TTT GAT-3'    |
| XDH           | 5'-ATG ACG AGG ACA ACG GTA GAT-3'    | 5'-TCA TAC TTG GAG ATC ATC ACG GT-3' |
| ADA           | 5'-ACC CGC ATT CAA CAA ACC CA-3'     | 5'-AGG GCG ATG CCT CTC TTC T-3'      |
